# Supplementary material for: RETRACTED ARTICLE: MDMA-assisted psychotherapy for treatment of PTSD: study design and rationale for phase 3 trials based on pooled analysis of six phase 2 randomized controlled trials
Source: PubMed Central journal article supplement (PMC6695343; doi:10.1007/s00213-019-05249-5), 2019-05-07
Supplement: 213_2019_5249_MOESM2_ESM.pdf [file 213_2019_5249_MOESM2_ESM.pdf]

## Disclosure of potential conflicts of interest

Authors must disclose all relationships or interests that could have direct or potential influence or impart bias on the work. Although an author may not feel there is any conflict, disclosure of all relationships and interests provides a more complete and transparent process, leading to an accurate and objective assessment of the work. Awareness of real or perceived conflicts of interest is a perspective to which the readers are entitled. This is not meant to imply that a financial relationship with an organization that sponsored the research or compensation received for consultancy work is inappropriate. For examples of potential conflicts of interests *that are directly or indirectly related to the research* please visit:

[www.springer.com/gp/authors-editors/journal-author/journal-author-helpdesk/publishing-ethics/14214](http://www.springer.com/gp/authors-editors/journal-author/journal-author-helpdesk/publishing-ethics/14214)

Corresponding authors of papers submitted to Psychopharmacology [include name of journal] must complete this form and disclose any real or perceived conflict of interest. The corresponding author signs on behalf of all authors.

The corresponding author will include a statement in that reflects what is recorded in the potential conflict of interest disclosure form. Please check the Instructions for Authors where to put the statement which may be different dependent on the type of peer review used for the journal. Please note that you cannot save the form once completed. Please print upon completion, sign, and scan to keep a copy for your files.

The corresponding author should be prepared to send the potential conflict of interest disclosure form if requested during peer review or after publication on behalf of all authors (if applicable).

We have no potential conflict of interest.

| Category of disclosure                                                                                                                                                                                                                                                                                                    | Description of Interest/Arrangement |
|---------------------------------------------------------------------------------------------------------------------------------------------------------------------------------------------------------------------------------------------------------------------------------------------------------------------------|-------------------------------------|
| Michael Mithoefer received salary support from MAPS PBC as a clinical investigator and clinical trial medical monitor as well as for training and supervision of research psychotherapists.                                                                                                                               |                                     |
| Allison Feduccia received salary support for full time employment with MAPS PBC.<br>Lisa Jerome received salary support for full time employment with MAPS PBC.<br>Anne Mithoefer received salary support from MAPS PBC as a clinical investigator and for training and supervision of research psychotherapists.         |                                     |
| Mark Wagner received research support to conduct study assessments.<br>Zach Walsh received research support to conduct study assessments.                                                                                                                                                                                 |                                     |
| Scott Hamilton received salary support from MAPS PBC as a biostatistician.<br>Berra Yazar-Klosinski received salary support for full time employment with MAPS.<br>Amy Emerson received salary support for full time employment with MAPS PBC.<br>Rick Doblin received salary support for full time employment with MAPS. |                                     |

Article title MDMA-assisted psychotherapy for treatment of PTSD: Study design and rationale for Phase 3 trials based on pooled analysis of six Phase 2 randomized controlled trials

Manuscript No. (if you know it) \_\_\_\_\_

Corresponding author name Allison Feduccia

Herewith I confirm, on behalf of all authors, that the information provided is accurate.

Author signature A Feduccia Date 11/26/18
